# Supplementary material
Source: PubMed Central journal article supplement (PMC4843614)
Supplement: rstb20150376supp1.pdf [file rstb20150376supp1.pdf]

Supplementary material for

*Phil. Trans. R. Soc. B* doi:10.1098/rstb.2015.0376

**The role of the basolateral amygdala in the perception of faces in natural contexts**

by *Ruud Hortensius, David Terburg, Barak Morgan, Dan J. Stein, Jack van Honk and Beatrice de Gelder*

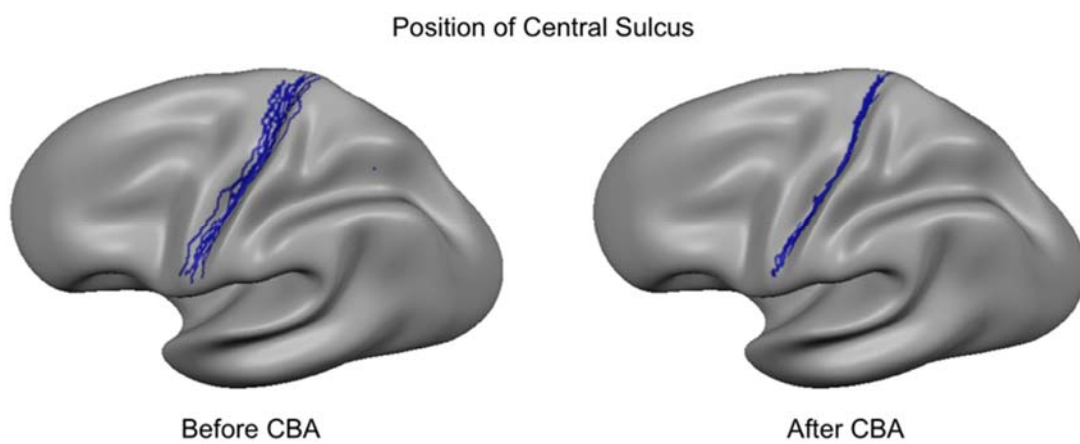

**Figure S1. Pre- and Post-Cortex-Based Alignment comparison of between-subjects**

**alignment.** Position of the left central sulcus for all participants before and after Cortex-Based

Alignment shown on a semi-inflated cortex representation.

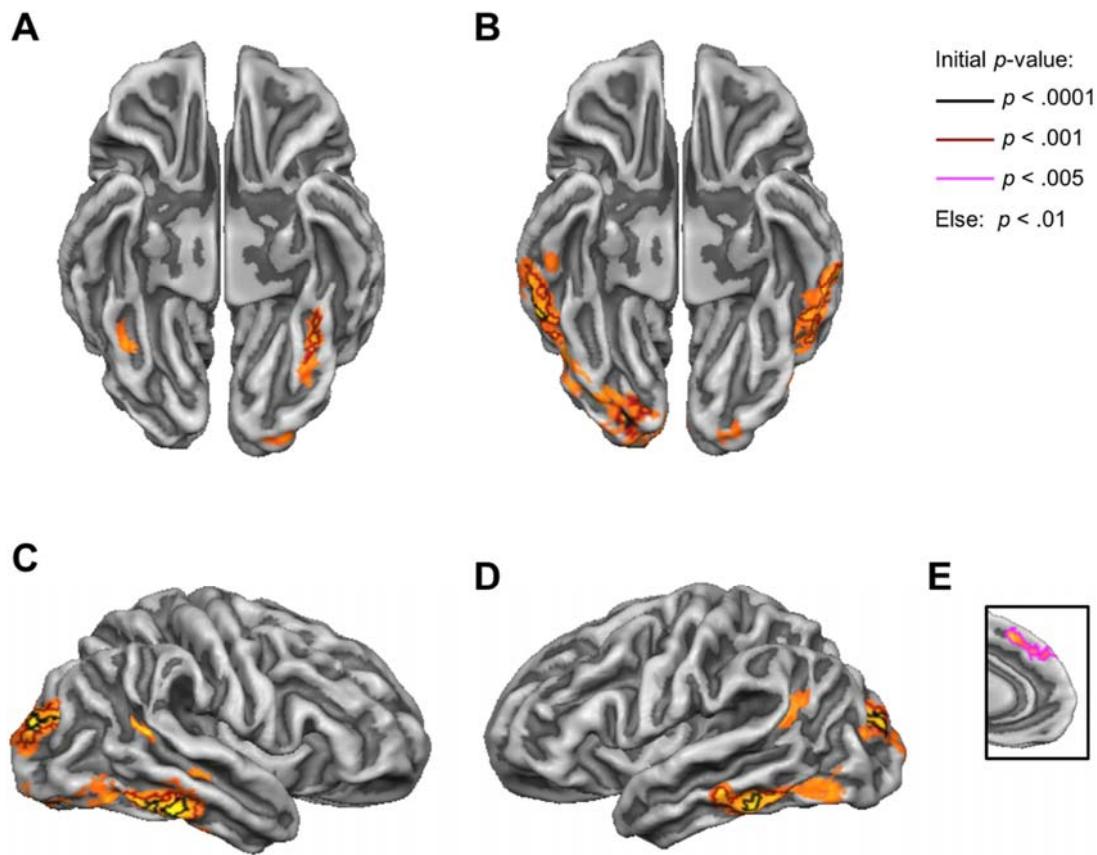

**Figure S2. Results from the categorical contrasts for both groups combined.** Faces compared to control shapes elicited activation in face-selective areas of the fusiform gyrus (A). Among others the transverse occipital sulcus and the fusiform gyrus were more activated to scenes compared to scrambled scenes (B-D). These findings are in line with previous studies [1,2]. UWDs compared to controls showed more activation to scenes versus scrambled scenes in the left superior frontal gyrus (E). **Table S1** report the outcome in detail. All activations are cluster-size corrected and lines denote if clusters survive a more stringent initial single voxel threshold.

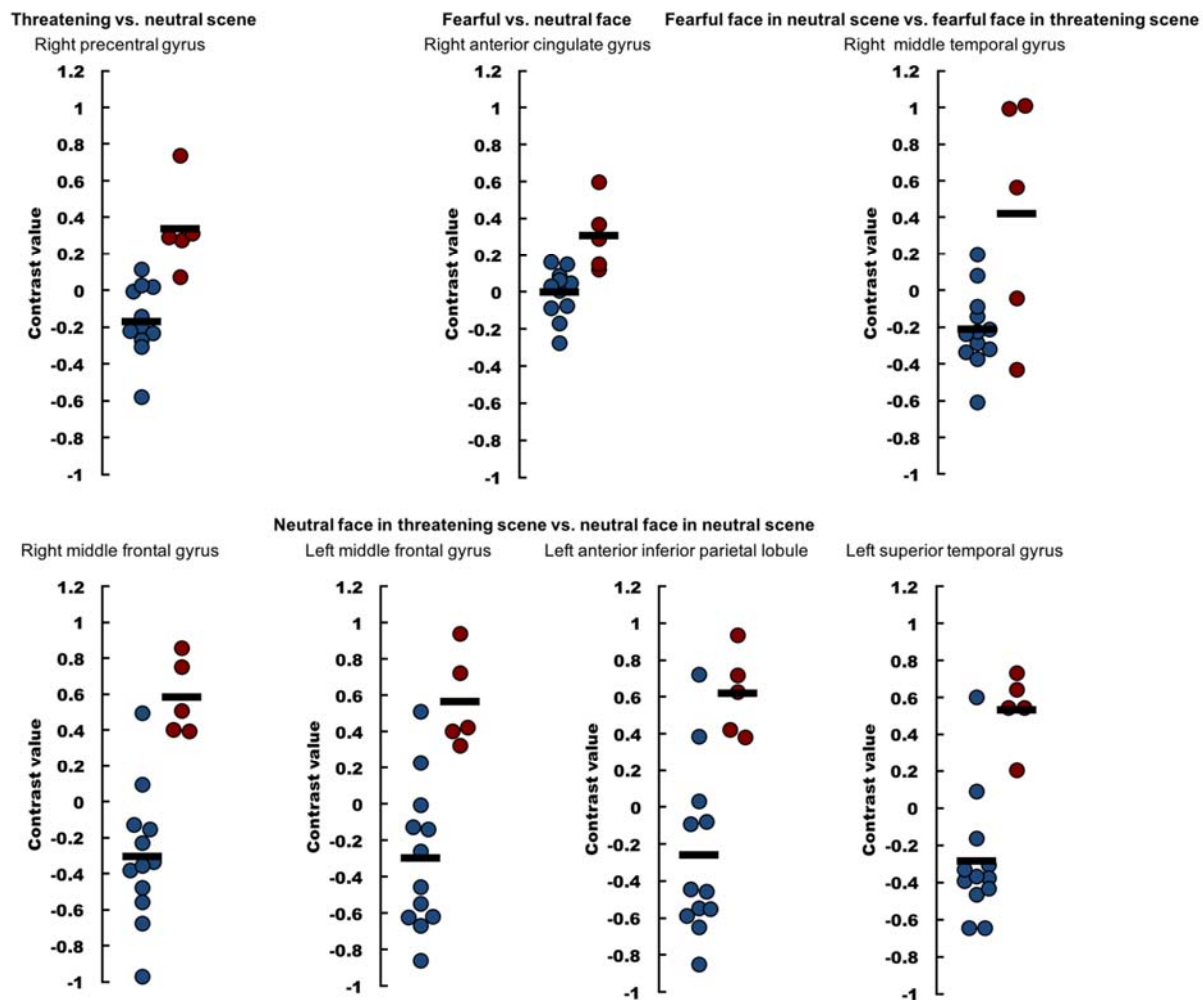

**Figure S3. Results for the main contrasts.** Beta values for each individual were extracted from the clusters and the contrast value calculated. The UWD group is represented by the red dots, and the control group by the blue dots. The black line indicates the group average.

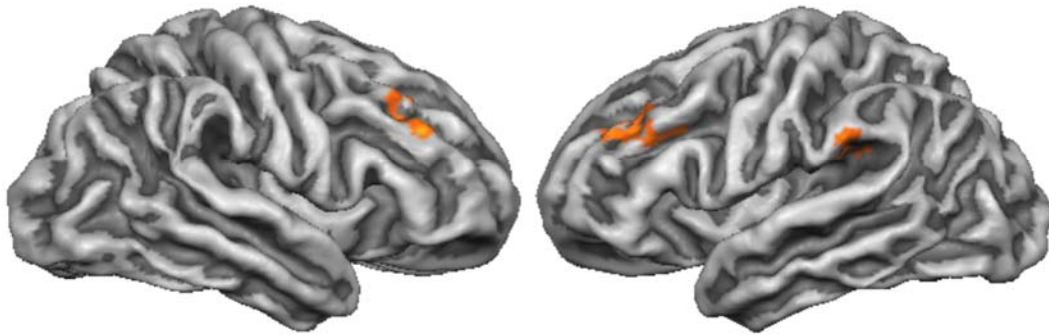

**Figure S4. Between group differences for neutral faces presented in a threatening compared to a scrambled scene.** UWDs compared to controls showed more activation in the left aIPL and bilateral middle frontal gyrus.

**Table S1** Outcome of the categorical contrasts for UWDs and controls combined

|                                     | Hemisphere | Talairach coordinates |     |     | Brodmann | <i>t</i> | <i>p</i> | Number of vertices |
|-------------------------------------|------------|-----------------------|-----|-----|----------|----------|----------|--------------------|
|                                     |            | x                     | y   | z   |          |          |          |                    |
| <i>Faces &gt; control shapes</i>    |            |                       |     |     |          |          |          |                    |
| Fusiform gyrus                      | RH         | 36                    | -53 | -14 | 37       | 5.585    | .000041  | 44                 |
| Fusiform gyrus                      | LH         | -36                   | -42 | -17 | 20       | 6.986    | .000003  | 115                |
| Inferior occipital gyrus            | LH         | -26                   | -88 | -11 | 18       | 4.383    | .000463  | 36                 |
| <i>Scenes &gt; scrambled scenes</i> |            |                       |     |     |          |          |          |                    |
| Middle temporal gyrus               | RH         | 52                    | -42 | -14 | 20       | 6.694    | .000005  | 580                |
| Precuneus                           | RH         | 30                    | -67 | 25  | 31       | 9.666    | <.000001 | 488                |
| Lingual gyrus                       | RH         | 20                    | -82 | -7  | 18       | 7.011    | .000003  | 150                |
| Superior temporal gyrus             | RH         | 46                    | -24 | -2  | 22       | 5.022    | .000125  | 57                 |
| Fusiform gyrus                      | RH         | 47                    | -23 | -21 | 20       | 3.953    | .001139  | 39                 |
| Lingual gyrus                       | RH         | 6                     | -81 | -3  | 18       | 5.610    | .000039  | 19                 |
| Superior temporal gyrus             | RH         | 47                    | -42 | 13  | 13       | 7.245    | .000002  | 76                 |
| Inferior temporal gyrus             | LH         | -51                   | -49 | -10 | 20       | 5.986    | .000019  | 599                |
| Middle occipital gyrus              | LH         | -23                   | -88 | 15  | 18       | 7.345    | .000002  | 295                |
| Superior temporal gyrs              | LH         | -41                   | -49 | 17  | 22       | 5.030    | .000123  | 134                |
| Fusiform gyrus                      | LH         | -21                   | -87 | -12 | 18       | 3.959    | .001125  | 25                 |

*p* < .01, cluster size corrected

**Table S2** Outcome for threatening versus neutral scenes for UWDs and controls separately and combined

|                                        | Hemisphere | Talairach coordinates |     |    | Brodmann | <i>t</i> | <i>p</i> | Number of vertices |
|----------------------------------------|------------|-----------------------|-----|----|----------|----------|----------|--------------------|
|                                        |            | x                     | y   | z  |          |          |          |                    |
| <i>Threatening &gt; neutral scene</i>  |            |                       |     |    |          |          |          |                    |
| Controls                               |            |                       |     |    |          |          |          |                    |
| Cuneus                                 | RH         | 7                     | -88 | 12 | 18       | 5.866    | .000108  | 13                 |
| UWDs                                   |            |                       |     |    |          |          |          |                    |
| Superior temporal gyrus                | RH         | 51                    | -30 | 7  | 22       | 8.771    | .000932  | 42                 |
| UWDs and controls combined             |            |                       |     |    |          |          |          |                    |
| No clusters                            |            |                       |     |    |          |          |          |                    |
| <i>Neutral &gt; threatening scenes</i> |            |                       |     |    |          |          |          |                    |
| Controls                               |            |                       |     |    |          |          |          |                    |
| Superior frontal gyrus                 | RH         | 18                    | 47  | 31 | 9        | 5.805    | .000118  | 52                 |
| Precentral gyrus                       | LH         | -58                   | -8  | 29 | 4        | 5.742    | .000130  | 49                 |
| Inferior parietal lobule               | LH         | -35                   | -40 | 54 | 40       | 5.356    | .000232  | 50                 |
| UWDs                                   |            |                       |     |    |          |          |          |                    |
| No clusters                            |            |                       |     |    |          |          |          |                    |
| UWDs and controls combined             |            |                       |     |    |          |          |          |                    |
| No clusters                            |            |                       |     |    |          |          |          |                    |

---

*p* < .01 (uncorrected) with an extended cluster size of 25.

**Table S3** Outcome for fearful versus neutral faces for UWDs and controls separately and combined

|                                      | Hemisphere | Talairach coordinates |          |          | Brodmann | <i>t</i> | <i>p</i> | Number of vertices |
|--------------------------------------|------------|-----------------------|----------|----------|----------|----------|----------|--------------------|
|                                      |            | <i>x</i>              | <i>y</i> | <i>z</i> |          |          |          |                    |
| <i>Fearful &gt; neutral face</i>     |            |                       |          |          |          |          |          |                    |
| Controls                             |            |                       |          |          |          |          |          |                    |
| Superior parietal lobule             | RH         | 17                    | -58      | 59       | 7        | 4.661    | .000693  | 79                 |
| UWDs                                 |            |                       |          |          |          |          |          |                    |
| No clusters                          |            |                       |          |          |          |          |          |                    |
| UWDs and controls combined           |            |                       |          |          |          |          |          |                    |
| Precuneus / superior parietal lobule | RH         | 13                    | -55      | 54       | 7        | 4.816    | .000190  | 189                |
| Middle occipital gyrus               | RH         | 30                    | -80      | -10      | 18       | 5.237    | .000081  | 34                 |
| Cuneus                               | RH         | 27                    | -91      | -1       | 18       | 3.910    | .001247  | 24                 |
| Precuneus                            | LH         | -10                   | -41      | 45       | 7        | 5.627    | .000038  | 61                 |
| Parahippocampal gyrus                | LH         | -8                    | -33      | 4        | 30       | 4.556    | .000324  | 86                 |
| Superior frontal gyrus               | LH         | -18                   | 25       | 50       | 6        | 4.710    | .000236  | 40                 |
| <i>Neutral &gt; fearful face</i>     |            |                       |          |          |          |          |          |                    |
| Controls                             |            |                       |          |          |          |          |          |                    |
| Superior temporal gyrus              | RH         | 39                    | 9        | -26      | 38       | 8.774    | .000003  | 174                |
| Superior temporal gyrus              | RH         | 54                    | -7       | 5        | 22       | 5.784    | .000122  | 54                 |
| Inferior frontal gyrus               | RH         | 26                    | 27       | -5       | 47       | 5.819    | .000116  | 30                 |
| Inferior temporal gyrus              | LH         | -40                   | -8       | -30      | 20       | 8.907    | .000002  | 72                 |
| Insula                               | LH         | -33                   | -8       | 0        | 13       | 4.796    | .000557  | 59                 |
| UWDs                                 |            |                       |          |          |          |          |          |                    |
| No clusters                          |            |                       |          |          |          |          |          |                    |
| UWDs and controls combined           |            |                       |          |          |          |          |          |                    |
| Inferior frontal gyrus               | RH         | 28                    | 32       | 1        | 47       | 7.239    | .000002  | 72                 |
| Uncus                                | RH         | 35                    | -6       | -27      | 20       | 5.482    | .000050  | 223                |
| Insula                               | RH         | 35                    | -6       | 0        | 13       | 4.136    | .000775  | 53                 |
| Superior temporal gyrus              | RH         | 56                    | -2       | 0        | 22       | 5.474    | .000051  | 62                 |
| Inferior frontal gyrus               | RH         | 47                    | 29       | 1        | 45       | 5.576    | .000042  | 46                 |
| Insula                               | LH         | -34                   | -11      | 2        | 13       | 5.203    | .000087  | 73                 |
| Precuneus                            | LH         | -15                   | -66      | 21       | 31       | 4.400    | .000447  | 26                 |
| Middle temporal gyrus                | LH         | -37                   | -7       | -28      | 21       | 7.246    | .000002  | 129                |
| Uncus                                | LH         | -31                   | -8       | -27      | 28       | 4.799    | .000197  | 45                 |
| Middle frontal gyrus                 | LH         | -29                   | 44       | -4       | 11       | 5.987    | .000019  | 23                 |

$p < .01$  (uncorrected) with an extended cluster size of 25.

**Table S4** Outcome for fearful faces in a neutral scene versus fearful faces in a threatening scene for UWDs and controls separately and combined

|                                                                                 | Hemisphere | Talairach coordinates |     |    | Brodmann | <i>t</i> | <i>p</i> | Number of vertices |
|---------------------------------------------------------------------------------|------------|-----------------------|-----|----|----------|----------|----------|--------------------|
|                                                                                 |            | x                     | y   | z  |          |          |          |                    |
| <i>Fearful face in a neutral scene &gt; fearful face in a threatening scene</i> |            |                       |     |    |          |          |          |                    |
| Controls                                                                        |            |                       |     |    |          |          |          |                    |
| Middle frontal gyrus                                                            | RH         | 26                    | 39  | 36 | 9        | 6.723    | .000033  | 19                 |
| UWDs                                                                            |            |                       |     |    |          |          |          |                    |
| No clusters                                                                     |            |                       |     |    |          |          |          |                    |
| UWDs and controls combined                                                      |            |                       |     |    |          |          |          |                    |
| No clusters                                                                     |            |                       |     |    |          |          |          |                    |
| <i>Fearful face in a threatening scene &gt; fearful face in a neutral scene</i> |            |                       |     |    |          |          |          |                    |
| Controls                                                                        |            |                       |     |    |          |          |          |                    |
| No clusters                                                                     |            |                       |     |    |          |          |          |                    |
| UWDs                                                                            |            |                       |     |    |          |          |          |                    |
| No clusters                                                                     |            |                       |     |    |          |          |          |                    |
| UWDs and controls combined                                                      |            |                       |     |    |          |          |          |                    |
| Posterior cingulate                                                             | RH         | 21                    | -58 | 11 | 30       | 6.818    | .000004  | 45                 |
| Cuneus                                                                          | RH         | 8                     | -83 | 7  | 17       | 4.916    | .000155  | 34                 |

*p* < .01 (uncorrected) with an extended cluster size of 25.



**Table S5** Outcome for neutral faces in a threatening scene versus neutral faces in a neutral scene for UWDs and controls separately and combined

|                                                                                 | Hemisphere | Talairach coordinates |     |    | Brodmann | <i>t</i> | <i>p</i> | Number of vertices |
|---------------------------------------------------------------------------------|------------|-----------------------|-----|----|----------|----------|----------|--------------------|
|                                                                                 |            | x                     | y   | z  |          |          |          |                    |
| Neutral face in a threatening scene > neutral face in a neutral scene           |            |                       |     |    |          |          |          |                    |
| Controls                                                                        |            |                       |     |    |          |          |          |                    |
| No clusters                                                                     |            |                       |     |    |          |          |          |                    |
| UWDs                                                                            |            |                       |     |    |          |          |          |                    |
| Superior temporal gyrus                                                         | RH         | 47                    | -20 | 1  | 22       | 14.385   | .000136  | 64                 |
| UWDs and controls combined                                                      |            |                       |     |    |          |          |          |                    |
| No clusters                                                                     |            |                       |     |    |          |          |          |                    |
| <i>Fearful face in a threatening scene &gt; fearful face in a neutral scene</i> |            |                       |     |    |          |          |          |                    |
| Controls                                                                        |            |                       |     |    |          |          |          |                    |
| Postcentral gyrus                                                               | LH         | -48                   | -20 | 17 | 43       | 7.044    | .000021  | 56                 |
| UWDs                                                                            |            |                       |     |    |          |          |          |                    |
| No clusters                                                                     |            |                       |     |    |          |          |          |                    |
| UWDs and controls combined                                                      |            |                       |     |    |          |          |          |                    |
| No clusters                                                                     |            |                       |     |    |          |          |          |                    |

$p < .01$  (uncorrected) with an extended cluster size of 25.

**Table S6** Outcome of exploratory ROI analyses

|                            | Hemisphere | Outcome                                                                                                                                                                                                                                                                                                                                                                                                                                |
|----------------------------|------------|----------------------------------------------------------------------------------------------------------------------------------------------------------------------------------------------------------------------------------------------------------------------------------------------------------------------------------------------------------------------------------------------------------------------------------------|
| Occipital face area        | RH         | Main effect for faces: $F(2,30) = 6.10, p = .006, \eta_p^2 = .29$ – fearful face > control shape<br>Main effect for scenes: $F(2,30) = 4.67, p = .017, \eta_p^2 = .24$ – neutral scene > scrambled scene<br>Faces * scenes interaction: $F(4,60) = 2.63, p = .043, \eta_p^2 = .15$ – control shape in a threatening scene > control shape in a scrambled scene / control shape in a neutral scene > control shape in a scrambled scene |
| Fusiform face area         | RH         | Main effect for faces: $F(2,30) = 11.53, p = .0002, \eta_p^2 = .44$ – fearful face > control shape / neutral face > control shape                                                                                                                                                                                                                                                                                                      |
| Parahippocampal place area | RH         | Main effect for scenes: $F(2,30) = 4.59, p = .018, \eta_p^2 = .23$ – threatening scene > scrambled scene / neutral scene > scrambled scene                                                                                                                                                                                                                                                                                             |
| Parahippocampal place area | LH         | Main effect for faces: $F(2,30) = 3.60, p = .04, \eta_p^2 = .19$ – control shape > neutral face                                                                                                                                                                                                                                                                                                                                        |
| Extrastriate body area     | RH         | -                                                                                                                                                                                                                                                                                                                                                                                                                                      |
| Superior temporal sulcus   | RH         | Fearful faces in a neutral vs. fearful faces in a threatening scene – UWDs > controls, $t(15) = 2.25, p = .04$ or non-parametric Mann-Whitney U test: $U = 9, p = .027$ .                                                                                                                                                                                                                                                              |
| Superior temporal sulcus   | LH         | -                                                                                                                                                                                                                                                                                                                                                                                                                                      |
| Cuneus                     | RH         | Main effect for group: $F(1,15) = 7.27, p = .017, \eta_p^2 = .33$ – UWDs > controls                                                                                                                                                                                                                                                                                                                                                    |

Only significant post-hoc effects are listed.

## References

1. Van den Stock, J., Vandenbulcke, M., Sinke, C. B. A. & de Gelder, B. 2014 Affective scenes influence fear perception of individual body expressions. *Human brain mapping*. **35**, 492–502. (doi:10.1002/hbm.22195)

2. Van den Stock, J., Vandenbulcke, M., Sinke, C. B. A., Goebel, R. & de Gelder, B. 2014 How affective information from faces and scenes interacts in the brain. *Social Cognitive and Affective Neuroscience*. **9**, 1481–1488. (doi:10.1093/scan/nst138)
